# Supplementary material for: Use of Expedited Regulatory Programs and Clinical Development Times for FDA-Approved Novel Therapeutics
Source: PubMed Central journal article supplement (PMC10472182; doi:10.1001/jamanetworkopen.2023.31753), 2023-08-31
Supplement: jamanetwopen-e2331753-s001.pdf [file jamanetwopen-e2331753-s001.pdf]

## Data Sharing Statement

Wong. Use of Expedited Regulatory Programs and Clinical Development Times for FDA-Approved Novel Therapeutics. *JAMA Netw Open*. Published August 31, 2023.

doi:10.1001/jamanetworkopen.2023.31753

### Data

**Data available:** Yes

**Data types:** Data (not involving human participants)

**How to access data:** Data available upon request upon publication:

[joshua.wallach@emory.edu](mailto:joshua.wallach@emory.edu)

**When available:** With publication

### Supporting Documents

**Document types:** None

### Additional Information

**Who can access the data:** Anyone requesting the data

**Types of analyses:** For any purpose

**Mechanisms of data availability:** Without investigator support

**Any additional restrictions:** None
